# Supplementary material for: A rapid review of COVID-19’s global impact on breast cancer screening participation rates and volumes from January to December 2020
Source: eLife journal article supplement (doi:10.7554/elife.85680), 2023-08-30
Supplement: supp [file elife_poa_e85680_Supplementary_file_1.xlsx]

## Sheet: Supplementary Table 1
Supplementary Table 1. Full descriptive characteristics of included cross-sectional studies (N=26)
Study	Publication type	Study design	Country	Region (If not national)	Total Female Population of Study Area	Sample size	Study screening data source	Screening (National/Regional)	Screening age range	Screening type	Screening time comparison	Primary Outcome£													Secondary outcome			Types of Restrictions present over study period#								COVID-19 7-day new infection rate (per 100000)*
												Volume before COVID-19	Volume after COVID-19	Raw volume change (n) @	Volume change relative to pre-COVID-19 period	Specific sub-period/conditiion of volume change@	Confidence interval@	Participation rate before COVID-19	Specific sub-period before COVID-19@	Participation rate after COVID-19	Specific sub-period after COVID-19@	Participation rate change relative to pre-COVID-19 period	Specific sub-period/condition of participation rate change@	Confidence interval@	Incidence before COVID-19	Incidence after COVID-19	Incidence change relative to pre-COVID-19 period	International Travel Limits	Internal Movement Controls	Stay at home requirement	Public transport closure	Ban on gatherings of >10 people	Public events ban	Workplace closure	School closure	Minimum infection rate in study period	Maximum infection rate in study period
Europe (n=7)
Campbell et al, 2021	Peer-reviewed	Cross sectional	Scotland (UK)		2728000	Not specified	NHS Scotland	National	50-70	Digital Mammography	Aug – Dec 2019 vs Aug -Dec 2020							0.69	2019-08-01	0.8	2020-08-01	0.1096	(Aug 2020 vs Aug 2019)					Yes	Yes	No	No	Yes	Yes	Yes	No	10.14	212.67
																		0.74	2019-12-01	0.79	2020-12-01	2-8%	(Range from Sep – Dec 2020 vs Sep-Dec 2019 and Jan -Mar 2020 vs Jan - Mar 2021) - these range of values were provided by the study. This however, surpassed the scope of our study which ended in Dec 2020
Jidkova et al, 2022	Peer-reviewed	Cross sectional	Belgium	Flanders	3382265	Not specified	Flanders Online Screening Database	Regional	50-69	Digital Mammography	Jul – Nov 2019 vs Jul – Nov 2020											-0.01		(-1.3; -0.7)				Yes	Yes	Yes	No	Yes	Yes	Yes	Yes	3.58	580.63
Knoll et al, 2022	Preprint	Cross sectional	Austria	Innsbruck	567300	596	Database from gynecological oncological center in Austria, Tyrol	Local	45 - 69 years invited for screening. Women aged 40 – 44 years and 70 - 75 years may opt in	Digital Mammography	Mar – Dec 2019 vs Mar – Dec 2020														263	212	-19.39%	Yes	Yes	Yes	No	Yes	Yes	Yes	Yes	no data	no data
Eijkelboom et al, 2021	Peer-reviewed	Cross sectional	Netherlands		8701000	3371	Netherlands Cancer Registry	National	50-75	Digital Mammography	Jan – Feb 2020 vs Jul – Aug 2020 (comparison of weekly average)														232.14	180.16	-9.01%	Yes	No	No	No	Yes	No	Yes	No	0.32	67.25
Losurdo et al, 2022	Peer-reviewed	Cross sectional	Italy	Friuli Venezia Giulia	624418	58643	“Data-Breast” database of the “Eusoma certified SSD Breast Unit of Trieste and from the Surgical Department of DAI Chirurgia Generale—ASUGI.	Regional	50-69	Digital Mammography	Oct – Dec 2019 vs Oct – Dec 2020			− 1987	− 11.9%	Oct - Dec 2020 vs Oct - Dec 2020 in FVG												Yes$	Yes$	Yes$	No$	Yes$	Yes$	Yes$	Yes$	19.2	497.6
														− 135196	− 23.7%	Oct - Dec 2020 vs Oct - Dec 2019 in whole of Italy
Toss et al, 2021	Peer-reviewed	Cross sectional	Italy	Northern Italy, Emilia Romagna	2291000	24994	Emilia Romagna National Healthcare System	Regional	45-79	Digital Mammography	2019 vs 2020														223 out of 15942	177 out of 9052	-39.74%	Yes$	Yes$	Yes$	Yes$	Yes$	Yes$	Yes$	Yes$	4	390.9
																									0.01399 (2019)	0.01955 (2020)
NHS England, 2021	Government paper	Cross sectional	England (UK)		33940000	2230000 (2019)	NHS England	National	50-71	Digital Mammography	2019 vs 2020 (monthly average post lockdown)	176666	148750		-0.158			0.691		0.618		-11.80%					+8.30%	Yes	Yes	Yes	Yes	Yes	Yes	Yes	Yes	0	92.36
Oceania (n=2)
BreastScreen Australia, 2020	Government Paper	Cross sectional	Australia		12780000	Not specified	BreastScreen Australia	National	50-74	Digital Mammography	May – Sep 2018 vs May – Sep 2020	428685	373461		-12.88%													Yes	Yes	Yes	No	Yes	Yes	Yes	Yes	0.18	13.31
BreastScreen Aotearoa, 2022	Government Paper	Cross sectional	New Zealand		2497000	Not specified	BreastScreen Aotearoa	National	45-69	Digital Mammography	May – Dec 2018 vs May - Dec 2020							71.6%		66.8%		-6.70%						Yes	Yes	Yes	No	Yes	Yes	Yes	Yes	0	1.06
Asia (n=1)
Shen et al, 2022	Peer-reviewed	Cross sectional	China	Taiwan	11981657	699911	Taiwan National Infectious Disease Statistics system	Regional	40-69	Digital Mammography	Jan – Apr 2019 vs Jan – Apr 2020	393385	306526		-0.2207													Yes	No	No	No	No	No	No	Yes	no data	no data
Americas (n=16)
Bessa et al, 2021	Peer-reviewed	Cross sectional	Brazil		106500000	(2019: 20636636; 2020: 21140958)	Brazilian Unified Health System (SUS)	National	50-69	Digital Mammography	2019 vs 2020	1810901	1037280		-42.7%			9.44% (2019)		5.33% (2020)		-0.4354						Yes	Yes	Yes	Yes	Yes	Yes	Yes	Yes	0	149.68
Riberio et al, 2022	Peer-reviewed	Cross sectional	Brazil		106500000	5996798	Brazilian National Health Service (SUS) Outpatient Information System (SIA/SUS), SUS Hospital Information System (SIH/SUS), High Complexity Procedure Authorizations database (APAC), Cancer Information System (ISCAN).	National	50-69	Digital Mammography	Jul – Dec 2019 vs Jul – Dec 2020	2006227	1173866		-0.4149													Yes	Yes	Yes	Yes	Yes	Yes	Yes	Yes	53.72	149.68
Chiarelli et al, 2021	Peer-reviewed	Cross sectional	Canada	Ontario	7371000	426967	Ontario Breast Screening Program (OBSP)	Regional	50-74	Digital Mammography, MRI (High risk)	Jul - Dec 2019 vs Jul - Dec 2020	361379	248275		-0.313													Yes	Yes	Yes	No	Yes	Yes	Yes	Yes	3.99	117.01
Walker et al, 2021	Peer-reviewed	Cross sectional	Canada	Ontario	7371000	605889 (2019) 284242 (2020)	Ontario Breast Screening Program (OBSP)	Regional	50-74	Digital Mammography	Modelled Dec 2019 data vs Dec 2020		~37000		-0.228													Yes	Yes	Yes	No	Yes	Yes	Yes	Yes	75.74	117.01
Doubova et al, 2021	Peer-reviewed	Cross sectional	Mexico		64570000	1431216	Mexican Institute of Social Security (IMSS)	National	40 - unspecified	Digital Mammography	Jan 2019 – Mar 2020 vs Apr – Dec 2020 (monthly average data)	77436	29964		-61.30%													Yes	Yes	Yes	No	No	Yes	Yes	Yes	2.6	61.12
Chen et al, 2021	Peer-reviewed	Cross sectional	USA		167500000	Not specified	HealthCore Integrated Research Database	National	50-79 years	Digital Mammography	Jul 2019 vs Jul 2020							~4500 per 10000		~4350 per 100000		-3.33%						Yes	Yes	Yes	No	Yes	Yes	Yes	Yes	119.03	142
Amornsiripanitch et al, 2021	Peer-reviewed	Cross sectional	USA	Massachusetts	3537000	32387	Electronic medical record (Epic, Verona, WI) - Massachusetts; One tertiary care academic center, a community hospital, a specialized cancer center, three outpatient imaging centers, one urban healthcare center, and one mobile mammography van	Regional	40 - unspecified years	Digital Mammography	Jun – Aug 2019 vs Jun – Aug 2020	9985	8932		-0.105			0.63		0.54		-0.148						Yes	Yes	No	No	Yes	Yes	No	No	17.06	53.09
Becker et al, 2021	Peer-reviewed	Cross sectional	USA	Michigan	5062000	7250080	Women enrolled in Health Managed Organization (HMO) Blue Cross Blue Shield (BCBS) in Michigan	Regional	40-74	Digital Mammography	Dec 2019 vs Dec 2020		~39 per 1000		0.181													Yes	Yes	Yes	No	Yes	Yes	Yes	Yes	147.56	328.94
DeGroff et al, 2021	Peer-reviewed	Cross sectional	USA		167500000	630264	Breast and Cervical Cancer Early Detection Program (NBCCEDP) Database, which provides cancer screening services to women with low income and inadequate health insurance	National	40-74	Digital Mammography	Average of Jun 2019/2018/2017/2016 vs Jun 2020		10626		-0.39													Yes	Yes	Yes	No	Yes	Yes	Yes	Yes	45.46	103.84
Dennis et al, 2021	Peer-reviewed	Cross sectional	USA		167500000	475083	Behavioral Risk Factor Surveillance System (BRFSS) survey database	National	40-74	Digital Mammography	2014-2019 vs 2020											-0.053	Age 50-79					Yes	Yes	Yes	Yes	Yes	Yes	Yes	Yes	0	460.68
																						-0.072	Age 40-49
Fedewa et al, 2021	Peer-reviewed	Cross sectional	USA		167500000	2019:142003 2020:150630	Data from 32 CHCs of the American Cancer Society's Community Health Advocates Implementing Nationwide Grants for Empowerment and Equity (CHANGE) grant program to increase BCSRs and follow-up care	National	50-74	Digital Mammography	2019 vs 2020							0.539		49.6%		-8%						Yes	Yes	Yes	Yes	Yes	Yes	Yes	Yes	0	460.68
Lehman et al, 2021	Preprint	Cross sectional	USA		167500000	29276	Screening database over 5 facilities	National	Unspecified	Digital Mammography	2019 vs 2020	8018	5087		-0.365													Yes	Yes	Yes	No	Yes	Yes	Yes	Yes	0	460.68
London et al, 2022	Peer-reviewed	Cross sectional	USA		167500000	34000000 (full study including colorectal cancers	TriNetX Research Network	National	Unspecified	Digital Mammography	Dec 2019 vs Dec 2020				0.2	Insufficient data for estimation, last data point from Dec 2019 vs Dec 2020 used. Percentage changes in "volume" over the comparator period ranged from -10% to 30% from Jul - Dec 2019 to Jul - Dec 2020												Yes	Yes	Yes	No	Yes	Yes	Yes	Yes	74.54	460.68
Miller et al, 2021	Peer-reviewed	Cross sectional	USA	Virginia	2757460	Not specified	Instituition Database, University of Virginia	Regional	Unspecified (45 - 70)	Digital Mammography	Jan – Nov 2019 vs Jan - Nov 2020	~15198	~13700		-0.098													Yes	Yes	Yes	No	Yes	Yes	Yes	Yes	no data	no data
Sprague et al, 2021	Peer-reviewed	Cross sectional	USA		167500000	461083	62 radiology facilities of Breast Cancer Surveillance Consortium	National	40-79	Digital Mammography	Jan-Jul 2019 vs Jan-Jul 2020	190454	126040		-0.103	Jul 2019 vs Jul 2020	-20.4, 6.6
															-0.338	Jan- Jul 2019 vs Jan-Jul 2020 (this included COVID-19 lockdown period)												Yes	Yes	Yes	No	Yes	Yes	Yes	Yes	0	142
Nyante et al, 2021	Peer-reviewed	Cross sectional	USA	North Carolina	5099371	42412	7 academic and community breast imaging facilities in North Carolina	Regional	40-79	Digital Mammography	Modelled Sep 2019 data vs Sep 2020				9%													Yes	No	No	No	No	Yes	Yes	Yes	80.27	91.26
N.B. England’s and Scotland’s NHS systems are devolved and therefore, are separate national entities. However, they hold similar screening criterion where Breast screening policy in NHS (across the UK) is that all women aged 50-70 years +364 days are invited for breast screening once every three years. £ - Formula to calculate primary outcomes if raw values regarding volume of screening and parti…
